# Supplementary material for: Identifying key domains of health-related quality of life for patients with Chronic Obstructive Pulmonary Disease: the patient perspective
Source: PubMed Central journal article supplement (PMC4226986; doi:10.1186/s12955-014-0106-3), 2014-07-09
Supplement: s12955-014-0106-3-S3.pdf [file s12955-014-0106-3-S3.pdf]

### Appendix III: Domain cards with example items.

| Domain                                                                |                           | Example 1                                                                           | Example 2                                                                      | Example 3                                                             |
|-----------------------------------------------------------------------|---------------------------|-------------------------------------------------------------------------------------|--------------------------------------------------------------------------------|-----------------------------------------------------------------------|
| <b>Anxiety</b>                                                        | The past 7 days:          | I felt anxious                                                                      | I found it hard to focus on anything other than my anxiety                     | I had sudden feelings of panic                                        |
| <b>Depression</b>                                                     | The past 7 days:          | I felt upset for no reason                                                          | I felt depressed                                                               | I felt unhappy                                                        |
| <b>Fatigue</b>                                                        | The past 7 days:          | How often did you have to push yourself to get things done because of your fatigue? | How often did your fatigue make it difficult to plan activities ahead of time? | To what degree did you feel tired even when you hadn't done anything? |
| <b>Physical function</b>                                              | With how much difficulty: | Are you able to put on a pullover sweater?                                          | Are you able to run 100 yards (100 m)?                                         | Are you able to turn from side to side in bed?                        |
| <b>Anger</b>                                                          | The past 7 days:          | I was irritated more than people knew                                               | I felt envious of others                                                       | I felt like I was ready to explode                                    |
| <b>Companionship</b>                                                  | To what extent:           | Do you have someone with whom to relax?                                             | Can you find companionship when you want it?                                   | Do you have someone with whom to have fun?                            |
| <b>Sleep related impairment</b>                                       | The past 7 days:          | I had a hard time getting things done because I was sleepy                          | I still felt sleepy when I woke up.                                            | I had a hard time concentrating because I was sleepy                  |
| <b>Pain interference</b>                                              | The past 7 days:          | How much did pain interfere with your close personal relationships?                 | How much did pain interfere with your enjoyment of social activities?          | How often was your pain so severe you could think of nothing else?    |
| <b>Pain behavior</b>                                                  | The past 7 days           | When I was in pain I grimaced                                                       | I had pain so bad it made me cry                                               | When I was in pain I screamed                                         |
| <b>Satisfaction with participation in social roles and activities</b> | To what extent:           | Are you satisfied with your ability to do household chores/tasks?                   | Are you satisfied with your ability to do all of the leisure activities        | Are you satisfied with your ability to run errands?                   |

---

|                                                              |                  |                                                                                  |                                                                                                                         |                                                                               |
|--------------------------------------------------------------|------------------|----------------------------------------------------------------------------------|-------------------------------------------------------------------------------------------------------------------------|-------------------------------------------------------------------------------|
| <b>Ability to participate in social roles and activities</b> | To what extent:  | Do you have to limit the things you do for fun with others?                      | that are really important to you?<br>Do you have trouble doing everything for your friends that you feel you should do? | Do you have trouble doing all of your regular leisure activities with others? |
| <b>Sleep disturbance</b>                                     | The past 7 days: | I tossed and turned at night                                                     | I got enough sleep                                                                                                      | I had trouble stopping my thoughts at bedtime                                 |
| <b>Informational support</b>                                 | To what extent:  | Do you have someone to turn to for suggestions about how to deal with a problem? | Do you get useful advice about important things in life?                                                                | Do your friends have useful information to help you with your problems?       |
| <b>Instrumental Support</b>                                  | To what extent:  | Do you have someone to take you to the doctor if you need it?                    | Do you have someone to help you clean up around the home if you need it?                                                | Do you have someone to pick up a prescription if you need it?                 |
| <b>Social isolation</b>                                      | To what extent:  | Do you feel that people avoid talking to you?                                    | Do you feel isolated from others?                                                                                       | Do you feel that some of your friends avoid you?                              |
| <b>Emotional support</b>                                     | To what extent:  | Do you have someone to confide in or talk to about yourself or your problems?    | Do you feel there are people who really understand you?                                                                 | Do you have someone who makes you feel needed?                                |

---
